# Supplementary figures and images for: Evolutionary Comparisons of the Chloroplast Genome in Lauraceae and Insights into Loss Events in the Magnoliids
Source: PubMed Central journal article supplement — Genome Biol Evol. 2017 Sep 4;9(9):2354–64. doi: 10.1093/gbe/evx180 (PMC5610729; doi:10.1093/gbe/evx180), 2017-09-04

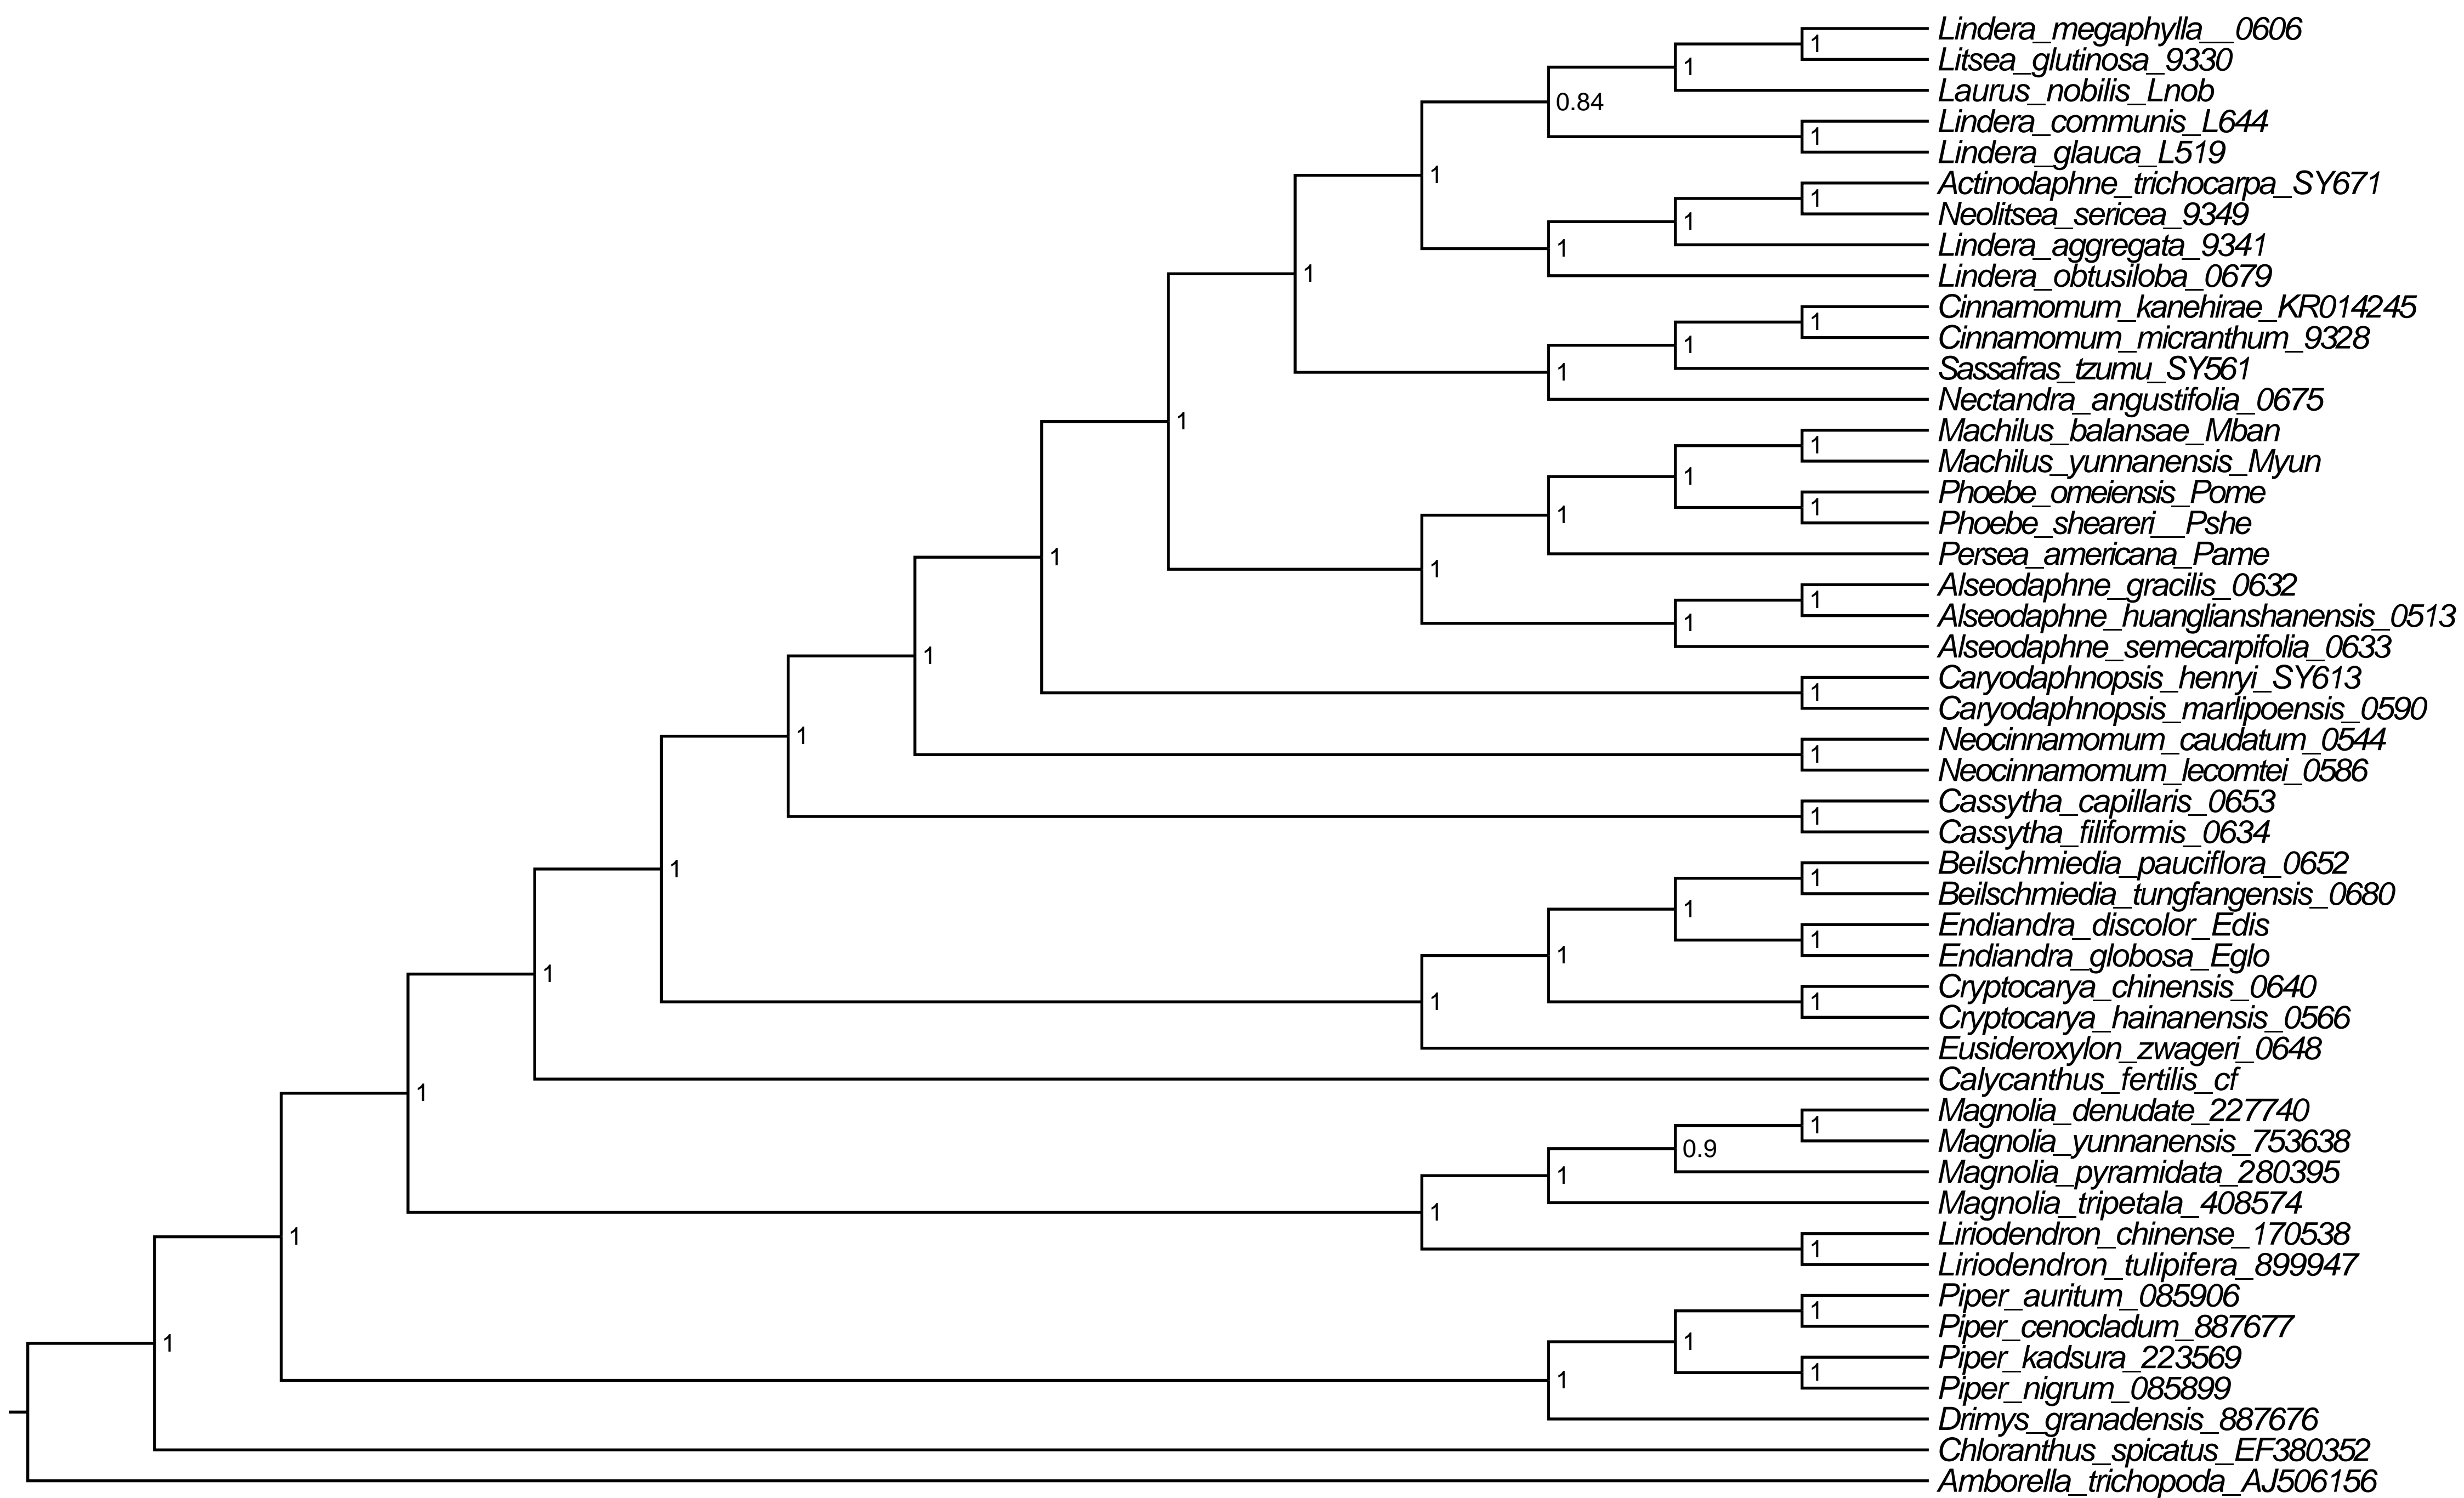

2.0

Supplement: evx180_SuppFig_S1.pdf [file evx180_SuppFig_S1.pdf]
